# Supplementary material
Source: PubMed Central journal article supplement (PMC3594402)
Supplement: NIHMS433537-supplement-1.pdf [file NIHMS433537-supplement-1.pdf]

## Supplemental figure 1

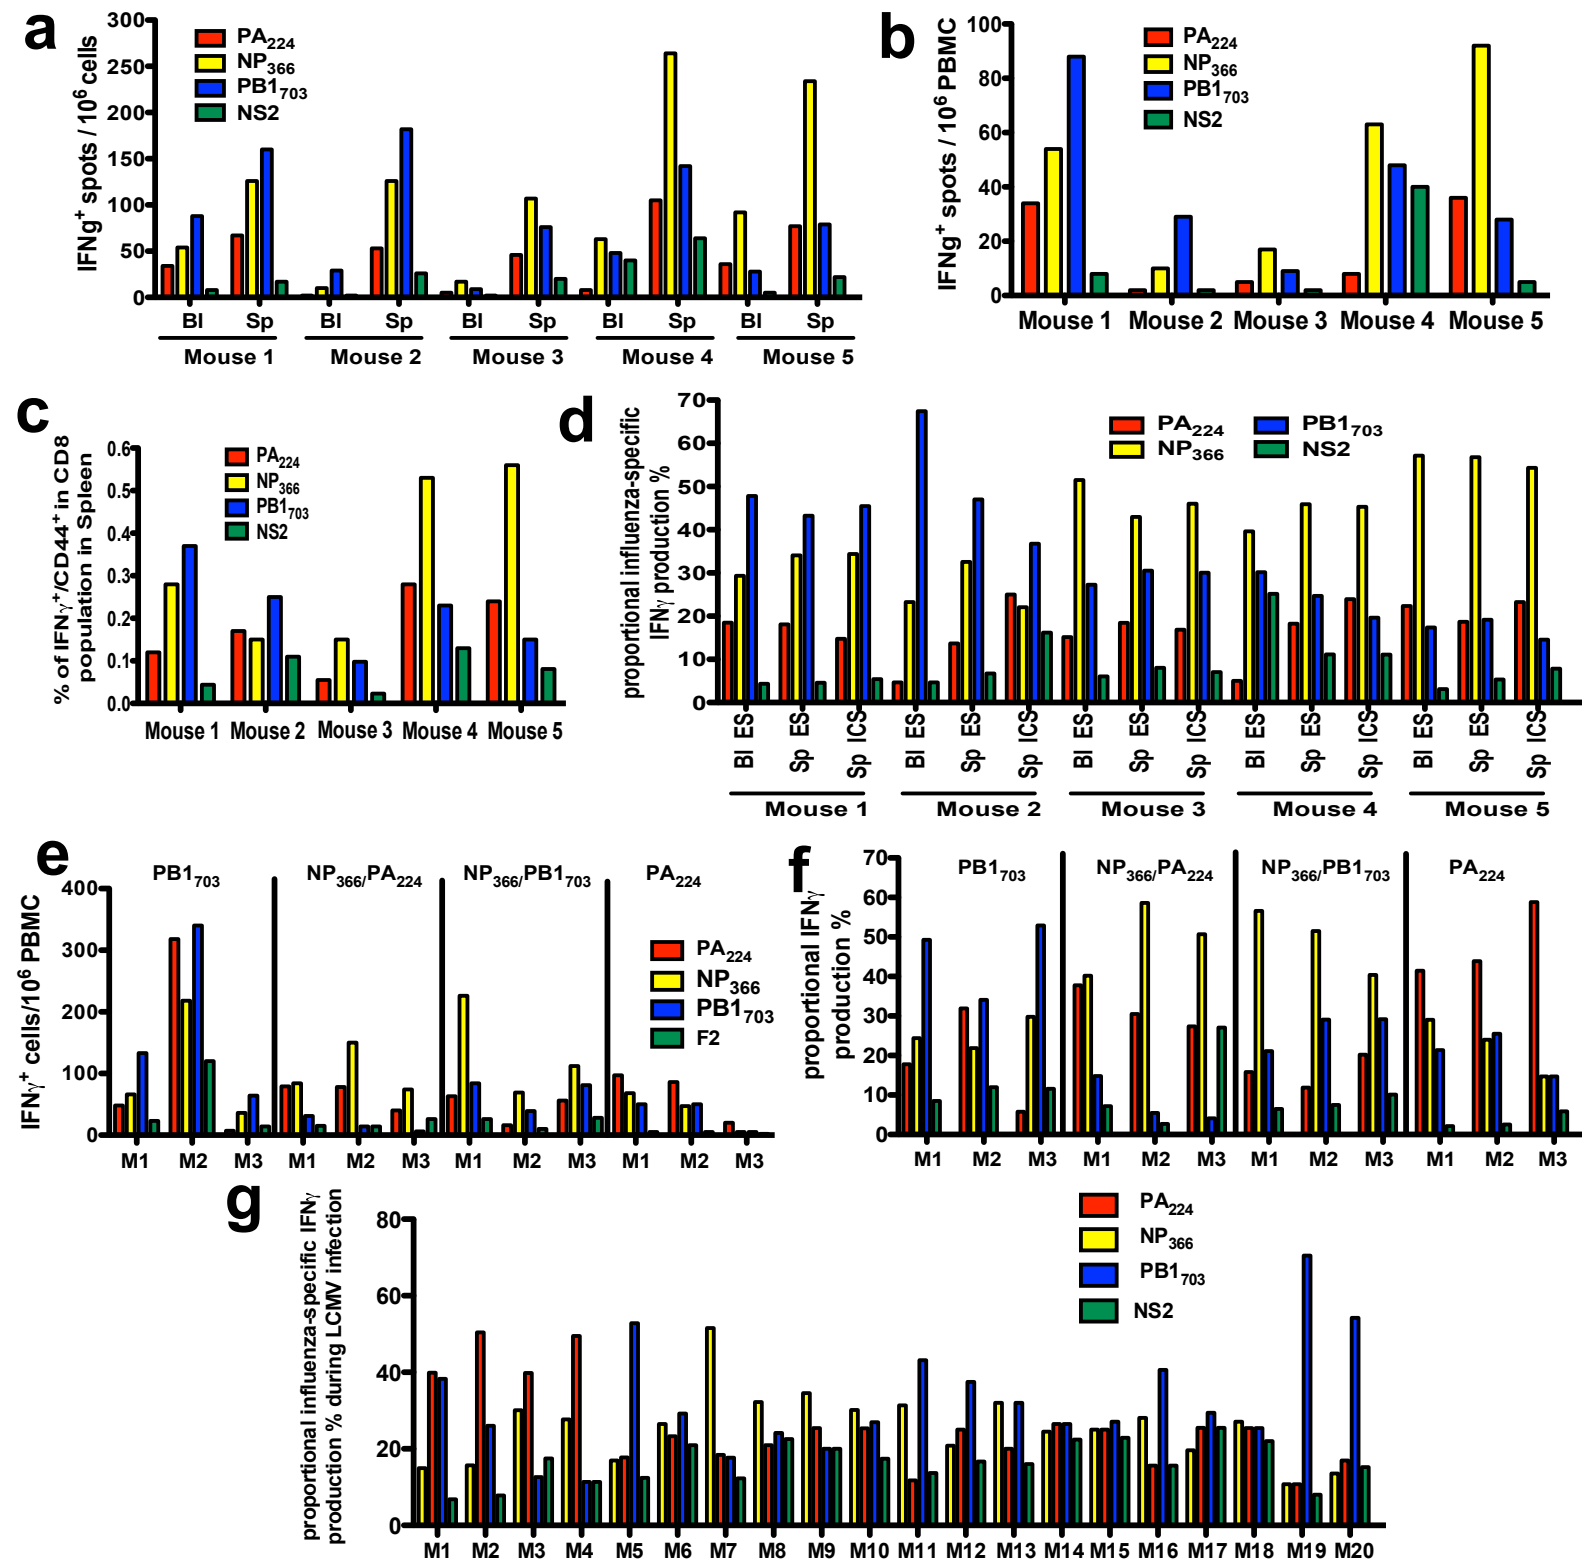

**Supplemental Figure S1. Similar IAV-specific memory immunodominance hierarchies in blood and spleen but variation between individuals.** Naïve mice were immunized with 70 PFU of IAV PR8 i.n. and then 6 weeks later IAV-specific memory cell hierarchies were tested by elispot assay of PBMC and splenocytes or ICS on splenocytes at the same time on the same mouse. (a) The hierarchy was measured with total number of each IAV-specific IFN $\gamma$ <sup>+</sup> cells / 10<sup>6</sup> PBMC in the blood (BI) or in the spleen (Sp) in the same mouse. Then the hierarchy by Elispot (ES) in the blood (b) was compared to the hierarchy by ICS in the spleen (c) for the same mouse. The proportional hierarchy of either the blood or the spleen, using Elispot or ICS, were calculated and compared (d). (e,f) The first group, called PB<sub>1703</sub>, represent mice where PB<sub>1703</sub>-specific cells dominate the hierarchy. The second group, called NP<sub>366</sub>/PA<sub>224</sub>, represent mice where NP<sub>366</sub> dominates the hierarchy and PA<sub>224</sub> is second. The third group, called NP<sub>366</sub>/PB<sub>1703</sub>, represent mice where NP<sub>366</sub> dominates the hierarchy and PB<sub>1703</sub> is second. Then IAV-immune mice were infected with LCMV and at day 7 or 9 after LCMV-infection IAV-specific memory cell hierarchies were tested by peptide stimulation and ICS (g). Then the percentage of mice using a particular IAV epitope as the dominant response before (n=12) and after LCMV (n=20) infection was calculated (Fig 2c).
