# Supplementary material
Source: PubMed Central journal article supplement (PMC3594402)
Supplement: NIHMS433537-supplement-3.pdf [file NIHMS433537-supplement-3.pdf]

## Supplemental figure 3

a

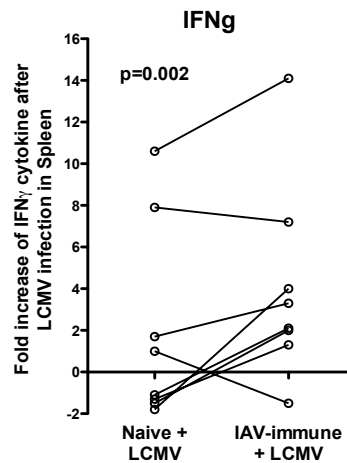

b

| Experiment      | experimental groups compared*                                                       | p value** |
|-----------------|-------------------------------------------------------------------------------------|-----------|
| Exp #1 (Fig 1b) | Naive + LCMV ( $^0/_{20}$ ) vs IAV + LCMV ( $^{10}/_{20}$ )                         | .0004     |
| Exp #2 (Fig 1c) | Naive + LCMV ( $^0/_{16}$ ) vs IAV + LCMV ( $^{19}/_{37}$ )                         | .0002     |
|                 | Naive + LCMV ( $^0/_{16}$ ) vs IAV + LCMV $\alpha$ CD4 ( $^{11}/_{20}$ )            | .0006     |
|                 | IAV + LCMV ( $^{19}/_{37}$ ) vs IAV + LCMV $\alpha$ CD8 ( $^4/_{19}$ )              | .04       |
|                 | IAV + LCMV $\alpha$ CD4 ( $^{11}/_{20}$ ) vs IAV + LCMV $\alpha$ CD8 ( $^4/_{19}$ ) | .048      |
| Exp #3 (Fig 4a) | Naive + LCMV ( $^0/_{8}$ ) vs IAV + LCMV ( $^7/_{7}$ )                              | .0002     |
|                 | Naive + LCMV ( $^0/_{8}$ ) vs IAV – NPKO + LCMV ( $^{11}/_{13}$ )                   | .0002     |
|                 | IAV + LCMV ( $^7/_{7}$ ) vs IAV – PAKO + LCMV ( $^3/_{13}$ )                        | .003      |
|                 | IAV + LCMV ( $^7/_{7}$ ) vs IAV NPPAKO + LCMV ( $^3/_{12}$ )                        | .003      |
| Exp #4 (Fig 4b) | Naive + LCMV ( $^0/_{8}$ ) vs IAV + LCMV ( $^8/_{8}$ )                              | .0002     |
|                 | Naive + LCMV ( $^0/_{8}$ ) vs IAV + LCMV NPKO ( $^8/_{8}$ )                         | .025      |
|                 | IAV + LCMV ( $^8/_{8}$ ) vs IAV + LCGPV ( $^0/_{8}$ )                               | .0002     |
|                 | IAV + LCMV ( $^8/_{8}$ ) vs IAV + LC GPIV ( $^1/_{8}$ )                             | .001      |
| Exp #5 (Fig 6d) | Naive + LCMV ( $^0/_{8}$ ) vs IAV + LCMV ( $^8/_{8}$ )                              | .001      |
|                 | Naive + LCMV ( $^8/_{8}$ ) vs IAV + LCMV (2 PEP) ( $^1/_{9}$ )                      | .003      |
| Exp #6 (Fig 7a) | Naive + LCMV ( $^0/_{8}$ ) vs IAV + LCMV ( $^8/_{8}$ )                              | .0002     |
|                 | IAV + LCMV ( $^8/_{8}$ ) vs IAV + LCMV $\alpha$ IFN ( $^2/_{8}$ )                   | .007      |

### Supplemental figure S3. Increased IFN $\gamma$ levels in spleen lysates of IAV-immune mice infected with LCMV and increase of Lung bronchiolization analyse by fisher exact test.

(a) Splenocytes were harvested and cells were lysed. Cell lysates from splenocytes at day 1, 3, 7, and 9 p.i. with LCMV were analyzed with Elisa Multiplex technique for cytokine production. The fold increase in cytokine production from day 0 for each time point was calculated. Then, the fold increase at the same time point was compared between naïve and IAV-immune mice infected with LCMV. For each time point splenocytes from 3 mice were pooled and the different time points from 2 independent experiments were used. Paired Student's T test was used to analyze data.

(b) The lung pathology day 7 p.i. with LCMV was scored. \* The number of mice which had bronchiolization in each group/total number of mice in that group is shown in parentheses for each treatment group. \*\* The two groups of mice were compared using the Fisher's Exact Test to determine if there was a significant difference in the number of mice that developed bronchiolization. The p value is shown for a two-tailed test at 95% confidence interval.
