# Supplementary material
Source: PubMed Central journal article supplement (PMC3594402)
Supplement: NIHMS433537-supplement-4.pdf [file NIHMS433537-supplement-4.pdf]

## Supplemental figure 4

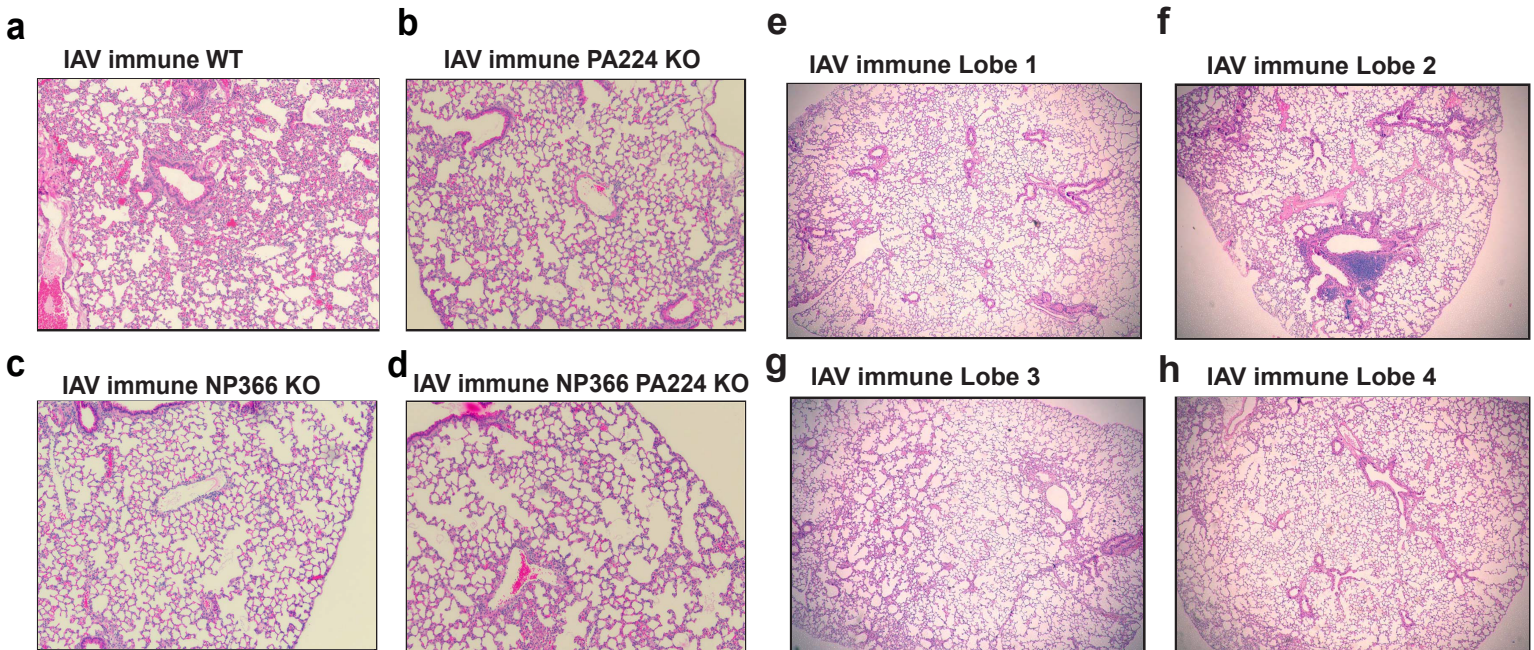

**i**

| MUTANT VIRUS CHART |                        |                          |                          |           |
|--------------------|------------------------|--------------------------|--------------------------|-----------|
| VIRUS              | NP396-404              | GP33/34-41               | GP276-286                | NP205-212 |
| WT LCMV            | FQPQNGQFI              | KAVYNFATC                | SGVENPGGYCL              | YTVKYPNL  |
| GPV                | WT                     | KAVYNL <del>A</del> TC   | SGVENP <del>D</del> GYCL | WT        |
| GP1V               | WT                     | KAVYNL <del>A</del> TC   | WT                       | WT        |
| NPV                | FQPQNGQ <del>L</del> I | WT                       | WT                       | WT        |
|                    |                        |                          |                          |           |
| VIRUS              | NP366-374              | PA224-233                |                          |           |
| WT IAV             | ASNENMETM              | SSLENFRAYV               |                          |           |
| PR-NP              | ASNE <del>Q</del> METM | WT                       |                          |           |
| PR-PA              | WT                     | SSLE <del>Q</del> FRAYVV |                          |           |
| PR-NP-PA           | ASNE <del>Q</del> METM | SSLE <del>Q</del> FRAYV  |                          |           |

**Supplemental figure S4. Similar mild pathology level in IAV-KO-immune mice as in WT IAV immune lungs.** Naïve mice were infected with either: IAV NP366/PA224 KO (a), IAV PA224 KO (b), IAV NP366 KO viruses (c), or IAV PA224/NP366 KO (d) and rested for 6 weeks. After 6 weeks when the mice were immune to IAV KO viruses lung sections were stained with H&E prior to LCMV challenge. All three groups showed normal lung structure with minimal residual BALT as in IAV WT lungs. Photographs depict a representative section showing a low power view from one of the 4-5 different lung sections that were used for scoring in each individual mouse demonstrating the type of lung pathology observed in each group. (e-h) Low power views of all four different lung sections of an IAV-immune mouse. Lung architecture is essentially normal. Only in section (b) is there evidence of one bronchiole with residual BALT. This same area of BALT is shown at higher power in Figure 1a(ii). (i)These mutant viruses and how they were derived are described in detail in references (18-23)
